# Supplementary material
Source: HighWire-hosted journal article supplement (https://www.annfammed.org/content/suppl/2020/09/14/18.5.463)
Supplement: Herges_Supp_App.pdf [file Herges_Supp_App.pdf]

**Supplemental material for:**

Herges JR, Ruehmann LL, Matulis III JC, Hickox BC, McCoy RG. Enhanced care team nurse process to improve diabetes care. *Ann Fam Med*. 2020;18(4):463.

INNOVATIONS IN PRIMARY CARE

## Enhanced Care Team Nurse Process to Improve Diabetes Care

Joseph R. Herges, PharmD<sup>1</sup>

Lisa L. Ruehmann, RN<sup>2</sup>

John C. Matulis III, DO<sup>3</sup>

Benjamin C. Hickox, APRN, CNS, DNP<sup>2</sup>

Rozalina G. McCoy, MD, MS<sup>3</sup>

<sup>1</sup>Pharmacy Services, Mayo Clinic, Rochester, Minnesota

<sup>2</sup>Department of Nursing, Mayo Clinic, Rochester, Minnesota,

<sup>3</sup>Division of Community Internal Medicine, Mayo Clinic, Rochester, Minnesota

**Funding support:** Dr McCoy is supported by the National Institute of Health National Institute of Diabetes and Digestive and Kidney Diseases (K23DK114497).

**Acknowledgments:** Andrew C. Greenlund, MD, PhD; Kari J. Mongeon-Wahlen, APRN, CNS, MS, MSN; and Kaymi Lang, RN for their contributions to the conception, planning, and implementation of this clinical effort.

### References

1. Stellefson M, Dipnarine K, Stopka C. The chronic care model and diabetes management in US primary care settings: a systematic review. *Prev Chronic Dis*. 2013;10:E26. 10.5888/pcd10.120180.
2. American Diabetes Association. Improving care and promoting health in populations: standards of medical care in diabetes-2019. *Diabetes Care*. 2019;42(Suppl 1):S7-S12.
3. Joint Commission of Pharmacy Practitioners. Pharmacists' patient care process. <https://jcphp.net/wp-content/uploads/2016/03/PatientCareProcess-with-supporting-organizations.pdf>. Published 2014. Accessed Oct 11, 2019.

## **Supplemental Appendix**

### **Content of Initial RN Assessment**

1. Medication review with adherence and adverse effect assessment
2. Social history and lifestyle factors
  - a. Eating pattern and weight history
  - b. Sleep behaviors
  - c. Physical activity
  - d. Tobacco, alcohol, substance use
  - e. Social supports
3. Barriers to effective diabetes management
4. Patient goals

### **Review of MN Community Measurement D5**

MN Community Measurement (MNCM) is a collaborative organization including physicians, hospitals and health systems, state government, consumers, employers and health plans. MNCM develops, collects, analyzes and publically reports health care quality, cost and patient experience information in an effort to empower the community. One measure reported by MNCM is the D5 for diabetes. This is an all or none composite measure for patients aged 18-75 and includes the following five components;

- HbA1c < 8% within the last 12 months
- In-office blood pressure < 140/90 within the past 12 months
- For patients with a co-morbidity of Ischemic Vascular/Cardiovascular Disease patient has documented aspirin/antiplatelet on medication list or contraindication/allergy

- Tobacco-free status documented within the last year
- LDL done in the last five years
  - Age 18-20 – no LDL requirement
  - Age 21-39 – LDL < 190 or on statin medication or a contraindication to a statin medication or attempt to use a statin medication in the last 5 years
  - Age 40-75 – LDL < 70 with the same other criteria as age 21-39
  - If Diabetic with Vascular Disease – LDL < 40 with the same other criteria as age 21-39

**Supplemental Figure.**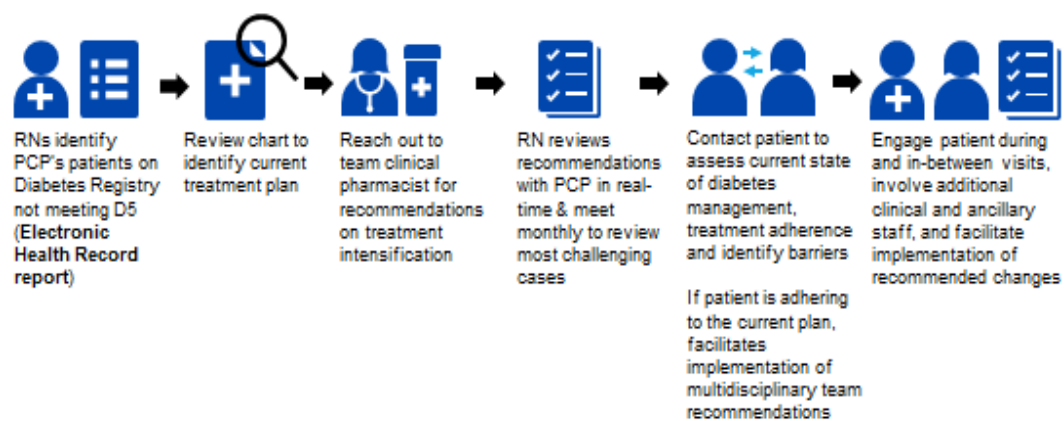

**Supplemental Table. Electronic Health Record Report Variables**

| <b>Patient Information</b> | <b>Optimal Care Measures Status (Met/not met)</b> | <b>Patient Assessment Tools</b>     |                                             |
|----------------------------|---------------------------------------------------|-------------------------------------|---------------------------------------------|
| Name                       | HbA1c                                             | Last HbA1c value and date           | Next diabetes outreach date                 |
| Medical record number      | Blood pressure                                    | Last blood pressure value and date  | Next primary care provider appointment date |
| Primary care provider      | Cholesterol                                       | Last LDL value and date             | Next appointment date in any department     |
| Care team name             | Aspirin/antiplatelet                              | Last tobacco use date               | Aspirin/antiplatelet name and strength      |
| Communication preference   | Tobacco-free status                               | Last tobacco assessment review date | Statin name and strength                    |
|                            | Composite                                         | Care coordination enrollment status |                                             |
